# Supplementary material
Source: Springer Nature journal article supplement (https://www.springermedizin.de/resource/supplementary/40169_2012_13_MOESM1_ESM.pdf/9675430)
Supplement: MOESM1 [file 9675430]

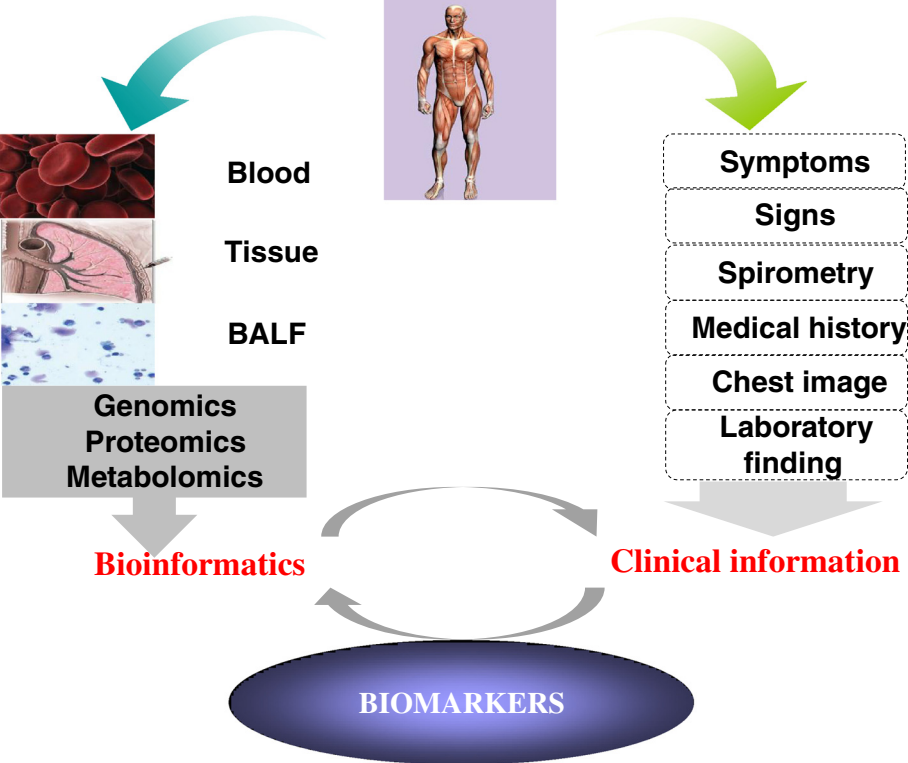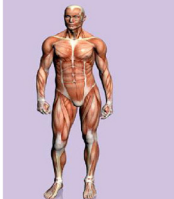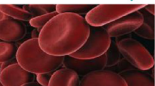

**Blood**

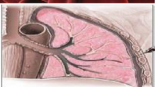

**Tissue**

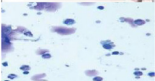

**BALF**

**Genomics**  
**Proteomics**  
**Metabolomics**

**Bioinformatics**

**Symptoms**

**Signs**

**Spirometry**

**Medical history**

**Chest image**

**Laboratory finding**

**Clinical information**

**BIOMARKERS**
